# Supplementary material
Source: ML conference proceedings conference paper supplement (https://openaccess.thecvf.com/content/CVPR2023/html/Kim_Event-Based_Video_Frame_CVPR_2023_paper.html)
Supplement: Supplementary file 1 [file Kim_Event-Based_Video_Frame_CVPR_2023_supplemental.zip]

Archive with 2 entries (2 files):
- supplementary.pdf
- video_demo.mp4
